# Supplementary material
Source: publisher site journal article supplement (https://www.dovepress.com/article/supplementary_file/532016/532016%20Table%20S1.docx)
Supplement: Supplementary file 1 [file 532016%20Table%20S1.docx]

| id |
| --- |
| MTUS1 |
| P2RX7 |
| SLC14A1 |
| SLC44A1 |
| CP |
| UGT8 |
| B3GALNT1 |
| CRYZL1 |
| ADAM23 |
| SLC25A46 |
| APBA1 |
| FGF12 |
| CADPS |
| STAU2 |
| GNB5 |
| GDAP1 |
| HIGD1A |
| PRMT8 |
| MARK1 |
| MFSD6 |
| SSTR1 |
| SEZ6L2 |

**Table S1: Intersection of DEGs from PD and NP datasets, yielding 22 Co-DEGs.**
